# Supplementary material for: Randomized Controlled Trial of a Collaborative Care Intervention for Mood Disorders by a National Commercial Health Plan
Source: Atypon-hosted journal article supplement (doi:10.1176/appi.ps.201800336), 2019-01-03
Supplement: appi.ps.201800336.ds001.pdf [file appi.ps.201800336.ds001.pdf]

**Appendix Table: Depression Symptoms and Mental Health QOL as a Function of Treatment Arm and Time\***

| Effect               | Depression Symptoms (PHQ-9) |      |              | MHQOL (SF-12 MCS Scores) |      |             |
|----------------------|-----------------------------|------|--------------|--------------------------|------|-------------|
|                      | beta                        | ±SE  | 95% CL       | beta                     | ±SE  | 95% CL      |
| CCM (vs usual care)  | -2.76                       | 0.92 | -4.60, -0.93 | 3.47                     | 2.12 | -0.73, 7.66 |
| Time                 | 0.13                        | 0.15 | -1.77, 0.44  | -0.21                    | 0.40 | -1.01, 0.59 |
| CCM × time           | 0.23                        | 0.21 | -0.19, 0.64  | -0.09                    | 0.62 | -1.35, 1.17 |
| Baseline scale score | 0.35                        | 0.06 | 0.23, 0.47   | 0.32                     | 0.07 | 0.19, 0.46  |

Abbreviation: CL means confidence limit, and SE = standard error

\*Each model included random intercepts for patients and a random slope only for the PHQ-9 model.

# CONSORT Flow Diagram for Primary (12-month) Clinical Outcomes

## Enrollment

Patients from Aetna health plan screened for Inclusion Criteria: Unipolar depression or bipolar disorder inpatient discharge diagnosis <=6 months: Aetna claims  
**N=9121**

Exclusion Criteria:  
 •Adult<21 years old  
 •Live outside of lower 48 United States  
 •Not covered by Aetna HMO or preferred provider products for >= 6 months  
 •Not fluent in English  
**N=7335**

Approached to Participate in Study  
**N=1786**

Declined participation (**N=403**):  
 •Not enough time  
 •Not interested  
 Could not be reached (**N=999**)  
 Determined to be Ineligible after approached (**N=104**):  
 •No Aetna coverage (N=101)  
 •Deceased (N=2)  
 •Unable to provide informed consent due to unstable condition, inpatient status, or unable to communicate in English (N=1)

Informed Consented  
**N=280**

Dropped Prior to Baseline (**N=42**):  
 •Not interested anymore (N=4)  
 •Unable to contact (N=38)

Baseline Assessment Completed  
**N=238**

Randomized

## Allocation

## Intervention

Usual Care  
**N=123**

CCM  
**N=115**

CCM Dropped Prior to 6-month assessment (**N=34**):  
 •Not interested (N=8)  
 •Deceased (N=1)  
 •Lost Aetna coverage (N=25)  
**Total missing assessments (N=37)**

Usual Care Dropped Prior to 6-month assessment (**N=23**):  
 •Lost Aetna Coverage (N=23)  
**Total missing assessments (N=31)**

6 months Attempted to contact: **N=100**  
 Completed: **N=69**

6 months Attempted to contact: **N=81**  
 Completed: **N=44**

## Follow-up Assessments

Dropped Prior to 12-month assessment (**N=21**):  
 •Deceased (N=1)  
 •Lost Aetna coverage (N=20)  
**Total missing Assessments (N=37)**

12 months Attempted to contact: **N=79**  
 Completed: **N=42**

12 months Attempted to contact: **N=63**  
 Completed: **N=31**

Dropped Prior to 12-month assessment (**N=18**):  
 •Not interested anymore (CCM N=3)  
 •Lost Aetna coverage (CCM N=15)  
**Total missing assessments (N=32)**
